# Supplementary material for: Analysis of monocyte infiltration in MPTP mice reveals that microglial CX3CR1 protects against neurotoxic over-induction of monocyte-attracting CCL2 by astrocytes
Source: PubMed Central journal article supplement (PMC5359822; doi:10.1186/s12974-017-0830-9), 2017-03-21
Supplement: 12974_2017_830_MOESM2_ESM.pdf [file 12974_2017_830_MOESM2_ESM.pdf]

**Table 1A: RNA profiling of Chemokines in the laser microdissected SNpc of MPTP mice. (general neurodegenerative markers)**

| Gene Symbol                                          | Ct-value Control | Ct-value 2 days | days after MPTP (acute) |        |        |  |  |  |  |  |
|------------------------------------------------------|------------------|-----------------|-------------------------|--------|--------|--|--|--|--|--|
|                                                      |                  |                 | 2 days                  | 4 days | 7 days |  |  |  |  |  |
|                                                      |                  |                 | fold change (RNA/qPCR)  |        |        |  |  |  |  |  |
| <b>expression of dopaminergic and gliosis marker</b> |                  |                 |                         |        |        |  |  |  |  |  |
| Th                                                   | 13,3             | 14,9            | -1,8                    | -1,5   | -1,6   |  |  |  |  |  |
| Gfap                                                 | 18,3             | 13,2            | 59,2                    | 51,5   | 85,1   |  |  |  |  |  |
| Mhc-II                                               | 25,6             | 21,0            | 33,6                    | 27,8   | 42,6   |  |  |  |  |  |
| Cd68                                                 | 21,7             | 17,7            | 27,2                    | 33,4   | 41,0   |  |  |  |  |  |

**Table 1B: RNA profiling of Chemokines in the laser microdissected SNpc of MPTP mice. (chemokine ligands and receptors)**

| Gene Symbol                                  | Receptor   | Ct-value Control | Ct-value 2 days | days after MPTP (acute) |        |                                                                  | Gene Symbol | Ct-value Control | Ct-value 2 days | days after MPTP (acute) |        |        |
|----------------------------------------------|------------|------------------|-----------------|-------------------------|--------|------------------------------------------------------------------|-------------|------------------|-----------------|-------------------------|--------|--------|
|                                              |            |                  |                 | 2 days                  | 4 days | 7 days                                                           |             |                  |                 | 2 days                  | 4 days | 7 days |
|                                              |            |                  |                 | fold change (RNA/qPCR)  |        |                                                                  |             |                  |                 | fold change (RNA/qPCR)  |        |        |
| <b>Chemokine Ligand expression:</b>          |            |                  |                 |                         |        | <b>expression of the main corresponding Chemokine Receptors:</b> |             |                  |                 |                         |        |        |
| <i>(Profiles correspond to Ligands only)</i> |            |                  |                 |                         |        |                                                                  |             |                  |                 |                         |        |        |
| <b>Profile A - Early Peak Induction:</b>     |            |                  |                 |                         |        |                                                                  |             |                  |                 |                         |        |        |
| CCL2 (MCP-1)                                 | CCR2       | 27,5             | 20,8            | 192,7                   | 12,2   | 8,4                                                              | CCR2        | 29,4             | 24,8            | 37,7                    | 15,8   | 12,9   |
| CCL7 (MCP-3)                                 | CCR2/3     | 28,3             | 24,7            | 29,6                    | 5,2    | 3,1                                                              | CCR2        | 29,4             | 24,8            | 37,7                    | 15,8   | 12,9   |
| CCL12 (MCP-5)                                | CCR2       | 25,1             | 17,7            | 300,1                   | 19,7   | 13,8                                                             | CCR2        | 29,4             | 24,8            | 37,7                    | 15,8   | 12,9   |
| CCL3 (MIP-1a)                                | CCR5/1     | 26,2             | 18,1            | 463,3                   | 134,0  | 185,8                                                            | CCR5        | 24,4             | 23,3            | 3,6                     | 4,9    | 4,6    |
| CCL4 (MIP-1b)                                | CCR5       | 28,8             | 18,7            | 1419,3                  | 181,4  | 176,9                                                            | CCR1        | 27,5             | 25,0            | 9,8                     | 5,4    | 3,9    |
| CXCL10 (IP-10)                               | CXCR3      | 28,3             | 16,6            | 4814,2                  | 616,1  | 289,8                                                            | CXCR3       | 27,0             | 23,8            | 15,5                    | 14,1   | 21,2   |
| CXCL11 (I-TAC)                               | CXCR3      | 30,9             | 25,0            | 157,4                   | 17,4   | 11,3                                                             | CXCR3       | 27,0             | 23,8            | 15,5                    | 14,1   | 21,2   |
| CCL8 (MCP-2)                                 | CCR1/2/3/5 | 29,1             | 25,0            | 19,5                    | 8,0    | 3,6                                                              | CCR1        | 27,5             | 25,0            | 9,8                     | 5,4    | 3,9    |
| CCL22 (MDC)                                  | CCR4       | 28,5             | 27,4            | 3,7                     | 1,7    | 1,9                                                              | CCR4        | Abs              | Abs             | Abs                     | Abs    | Abs    |
| CXCL2 (GROb)                                 | CXCR2      | 33,7             | 28,8            | 32,8                    | 24,7   | 1,7                                                              | CXCR2       | 28,0             | 27,1            | -7,9                    | -3,7   | -5,6   |
| <b>Profile B - Persistent Upregulation:</b>  |            |                  |                 |                         |        |                                                                  |             |                  |                 |                         |        |        |
| CXCL9 (MIG)                                  | CXCR3      | Abs              | 23,7            | 108,6                   | 192,6  | 131,7                                                            | CXCR3       | 27,0             | 23,8            | 15,5                    | 14,1   | 21,2   |
| CXCL4 (PF4)                                  | CXCR3 *    | 26,0             | 25,3            | 2,8                     | 2,8    | 3,1                                                              | CXCR3       | 27,0             | 23,8            | 15,5                    | 14,1   | 21,2   |
| CXCL16 (SR-PSOX)                             | CXCR6      | 24,6             | 19,0            | 76,2                    | 44,4   | 59,6                                                             | CXCR6       | 31,1             | 26,1            | 35,4                    | 30,0   | 58,0   |
| CXCL14 (BRAK)                                | unknown    | 17,1             | 16,7            | 2,3                     | 1,9    | 2,2                                                              | --          | --               | --              | --                      | --     | --     |
| CCL9 (MIP-1g)                                | CCR1 *     | 24,3             | 20,7            | 19,7                    | 16,6   | 26,1                                                             | CCR1        | 27,5             | 25,0            | 9,8                     | 5,4    | 3,9    |
| CCL5 (RANTES)                                | CCR5/3/1   | 27,6             | 20,9            | 162,9                   | 165,0  | 228,2                                                            | CCR5        | 24,4             | 23,3            | 3,6                     | 4,9    | 4,6    |
| CCL11 (EOTAXIN)                              | CCR3       | 26,4             | 25,6            | 2,8                     | 2,1    | 2,0                                                              | CCR3        | Abs              | Abs             | Abs                     | Abs    | Abs    |
| CCL19 (MIP-3b)                               | CCR7       | 25,4             | 25,2            | 2,0                     | 1,8    | 2,1                                                              | CCR7        | Abs              | Abs             | Abs                     | Abs    | Abs    |
| CXCL5/6 (ENA-78/GCP-2)                       | CXCR2/1    | 26,6             | 26,1            | 2,3                     | 3,9    | 3,3                                                              | CXCR2       | 28,0             | 27,1            | -7,9                    | -3,7   | -5,6   |
| CXCL1 (GROa)                                 | CXCR2      | 29,2             | 28,6            | 2,4                     | 2,4    | 2,3                                                              | CXCR2       | 28,0             | 27,1            | -7,9                    | -3,7   | -5,6   |
| <b>Profile C - Late Upregulation:</b>        |            |                  |                 |                         |        |                                                                  |             |                  |                 |                         |        |        |
| CCL6 (MRP-1)                                 | CCR5 *     | 23,3             | 20,4            | 13,1                    | 21,2   | 40,2                                                             | CCR5        | 24,4             | 23,3            | 3,6                     | 4,9    | 4,6    |
| xCLI (LYMPHOTACTIN)                          | XCRI       | 33,6             | 28,6            | 27,6                    | 40,6   | 62,1                                                             | xCRI        | Abs              | 29,4            | 26,9                    | nc     | 3,6    |
| <b>Profile D - Downregulation:</b>           |            |                  |                 |                         |        |                                                                  |             |                  |                 |                         |        |        |
| CCL28 (MEC)                                  | CCR10/3    | 23,8             | 25,4            | -1,8                    | -1,5   | -1,6                                                             | CCR10       | 28,0             | 28,6            | nc                      | nc     | nc     |
| CCL20 (MIP-3a)                               | CCR6       | 25,4             | 27,0            | -1,8                    | -2,1   | -2,0                                                             | CCR6        | 29,8             | 29,5            | 2,6                     | 5,5    | 9,2    |
| CCL17 (TARC)                                 | CCR4       | 28,9             | 29,0            | nc                      | nc     | -2,1                                                             | CCR4        | Abs              | Abs             | Abs                     | Abs    | Abs    |
| CXCL13 (BCA-1)                               | CXCR5      | 23,9             | 24,8            | nc                      | nc     | -1,9                                                             | CXCR5       | Abs              | 33,0            | 12,5                    | nc     | 8,0    |
| <b>mixed regulation:</b>                     |            |                  |                 |                         |        |                                                                  |             |                  |                 |                         |        |        |
| CCL24 (EOTAXIN-2)                            | CCR3       | 27,4             | 28,8            | -1,6                    | 1,5    | 1,7                                                              | CCR3        | Abs              | Abs             | Abs                     | Abs    | Abs    |
| <b>not changed:</b>                          |            |                  |                 |                         |        |                                                                  |             |                  |                 |                         |        |        |
| CCL21 (TCA-4)                                | CCR7/6     | 26,2             | 26,8            | nc                      | nc     | nc                                                               | CCR7        | Abs              | Abs             | Abs                     | Abs    | Abs    |
| CCL25 (TECK)                                 | CCR9       | 21,0             | 21,5            | nc                      | nc     | nc                                                               | CCR9        | 27,4             | 27,5            | 1,5                     | 1,5    | 1,6    |
| CCL27a (ESKINE)                              | CCR10      | 18,1             | 18,9            | nc                      | nc     | nc                                                               | CCR10       | 28,0             | 28,6            | nc                      | nc     | -1,3   |
| CXCL3 (GROg)                                 | CXCR2      | 29,9             | 29,8            | nc                      | nc     | nc                                                               | CXCR2       | 28,0             | 27,1            | -7,9                    | -3,7   | -5,6   |
| CXCL7 (PPBP/NAP-2)                           | CXCR2      | 24,6             | 25,1            | nc                      | nc     | nc                                                               | CXCR2       | 28,0             | 27,1            | -7,9                    | -3,7   | -5,6   |
| CXCL12 (SDF-1)                               | CXCR4      | 21,8             | 22,2            | nc                      | nc     | nc                                                               | CXCR4       | 24,9             | 24,4            | 2,3                     | 5,2    | 9,6    |
| CX3CL1 (FRAKTALKINE)                         | CX3CR1     | 16,5             | 17,1            | nc                      | nc     | nc                                                               | CX3CR1      | 18,9             | 17,2            | 5,8                     | 6,1    | 9,5    |
| CCL1 (TCA-3)                                 | CCR8       | Abs              | Abs             | Abs                     | Abs    | Abs                                                              | CCR8        | Abs              | 32,5            | 6,7                     | nc     | 28,0   |
| CCL26 (EOTAXIN-3)                            | CCR3       | Abs              | Abs             | Abs                     | Abs    | Abs                                                              | CCR3        | Abs              | Abs             | Abs                     | Abs    | Abs    |
| CXCL17                                       | CXCR8      | Abs              | Abs             | Abs                     | Abs    | Abs                                                              | CXCR8       | ND               | ND              | ND                      | ND     | ND     |
| <b>Decoy Chemokine Receptors</b>             |            |                  |                 |                         |        |                                                                  |             |                  |                 |                         |        |        |
| DARC                                         |            | 23,6             | 23,5            | 1,9                     | 1,7    | nc                                                               |             |                  |                 |                         |        |        |
| D6                                           |            | 27,4             | 27,5            | nc                      | 1,6    | nc                                                               |             |                  |                 |                         |        |        |
| CCX-CKR                                      |            | Abs              | Abs             | Abs                     | Abs    | Abs                                                              |             |                  |                 |                         |        |        |

**Table 1C:** RNA profiling of Chemokines in the laser microdissected SNpc of MPTP mice.  
(additional inflammation related genes implicated in neuro-glia-immune interactions)

| Gene Symbol                                     | Ct-value<br>Control | Ct-value<br>2 days | days after MPTP (acute) |         |        |
|-------------------------------------------------|---------------------|--------------------|-------------------------|---------|--------|
|                                                 |                     |                    | 2 days                  | 4 days  | 7 days |
|                                                 |                     |                    | fold change (RNA/qPCR)  |         |        |
| <b>expression of general inflammatory genes</b> |                     |                    |                         |         |        |
| <b>Markers of glial reactivity</b>              |                     |                    |                         |         |        |
| B2m                                             | 17,8                | 15,9               | 6,0                     | 8,1     | 8,4    |
| Cd11c                                           | 29,3                | 23,6               | 83,9                    | 103,8   | 728,6  |
| Cd68                                            | 21,7                | 17,7               | 27,2                    | 33,4    | 41,0   |
| Gfap                                            | 18,3                | 13,2               | 59,2                    | 51,5    | 85,1   |
| Lilrb3                                          | 27,1                | 24,8               | 8,8                     | 11,4    | 10,6   |
| Mhc-II                                          | 25,6                | 21,0               | 33,6                    | 27,8    | 42,6   |
| <b>Lymphocyte markers</b>                       |                     |                    |                         |         |        |
| Cd3e                                            | 32,3                | 26,6               | 60,9                    | 58,1    | 112,9  |
| Foxp3                                           | Abs                 | Abs                | Abs                     | Abs     | Abs    |
| Il17a                                           | Abs                 | Abs                | Abs                     | Abs     | Abs    |
| Rorc                                            | 23,6                | 23,9               | nc                      | 3,8     | 5,3    |
| Tbx21                                           | 20,2                | 19,2               | 22,0                    | 28,4    | 38,4   |
| <b>Inflammatory/adhesion molecules</b>          |                     |                    |                         |         |        |
| Il1b                                            | 30,1                | 29,3               | 1,8                     | 2,0     | 2,5    |
| Icam1                                           | 27,5                | 24,4               | 14,9                    | 9,0     | 15,5   |
| Itgae                                           | 22,7                | 23,9               | nc                      | -1,6    | -2,3   |
| Itgb2                                           | 22,7                | 19,2               | 19,0                    | 19,7    | 28,6   |
| Madcam1                                         | 30,6                | 28,4               | 7,5                     | 17,4    | 102,4  |
| Selp                                            | Abs                 | Abs                | nc                      | nc      | nc     |
| Selp1g                                          | 18,9                | 17,4               | 4,8                     | 5,7     | 5,9    |
| Timp1                                           | 29,7                | 19,2               | 2518,0                  | 225,8   | 215,7  |
| Vcam1                                           | 20,2                | 19,2               | 3,4                     | 3,1     | 3,3    |
| <b>Potential neuronal stress markers</b>        |                     |                    |                         |         |        |
| Cd200                                           | 17,0                | 18,0               | nc                      | nc      | nc     |
| Cd200R1                                         | 27,5                | 25,1               | 9,2                     | 8,8     | 16,4   |
| Cd22                                            | 28,4                | 24,0               | 32,8                    | 103,6   | 196,6  |
| Cd44                                            | 25,2                | 20,1               | 70,9                    | 22,1    | 26,8   |
| Cd47                                            | 16,2                | 17,0               | nc                      | nc      | nc     |
| Hspd1                                           | 20,5                | 21,1               | nc                      | nc      | nc     |
| Mhc-I                                           | 20,0                | 17,5               | 9,2                     | 13,2    | 13,5   |
| Mmp3                                            | Abs                 | 28,5               | 12830,5                 | 13520,5 | 181,5  |
| NT-3                                            | 21,6                | 22,9               | -1,5                    | -1,6    | -1,7   |
| Snca                                            | 14,3                | 15,6               | -1,5                    | -1,5    | -1,5   |
| Spp1                                            | 19,7                | 18,6               | 3,7                     | 2,6     | 8,7    |
| Trem2                                           | 20,3                | 17,8               | 9,2                     | 17,3    | 34,9   |

Suppl. Table 1.
