# Supplementary material for: Analysis of monocyte infiltration in MPTP mice reveals that microglial CX3CR1 protects against neurotoxic over-induction of monocyte-attracting CCL2 by astrocytes
Source: PubMed Central journal article supplement (PMC5359822; doi:10.1186/s12974-017-0830-9), 2017-03-21
Supplement: 12974_2017_830_MOESM3_ESM.pdf [file 12974_2017_830_MOESM3_ESM.pdf]

**A**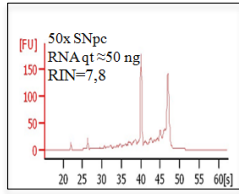

BioAnalyzer

**B**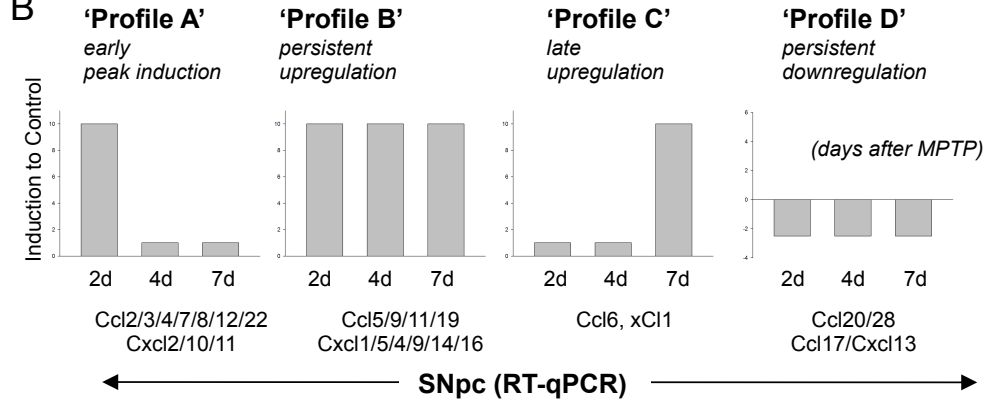

Suppl. Figure 2.
