# Supplementary material for: Analysis of monocyte infiltration in MPTP mice reveals that microglial CX3CR1 protects against neurotoxic over-induction of monocyte-attracting CCL2 by astrocytes
Source: Springer Nature journal article supplement (doi:10.1186/s12974-017-0830-9), 2017-03-21
Supplement: MOESM5 [file 12157774]

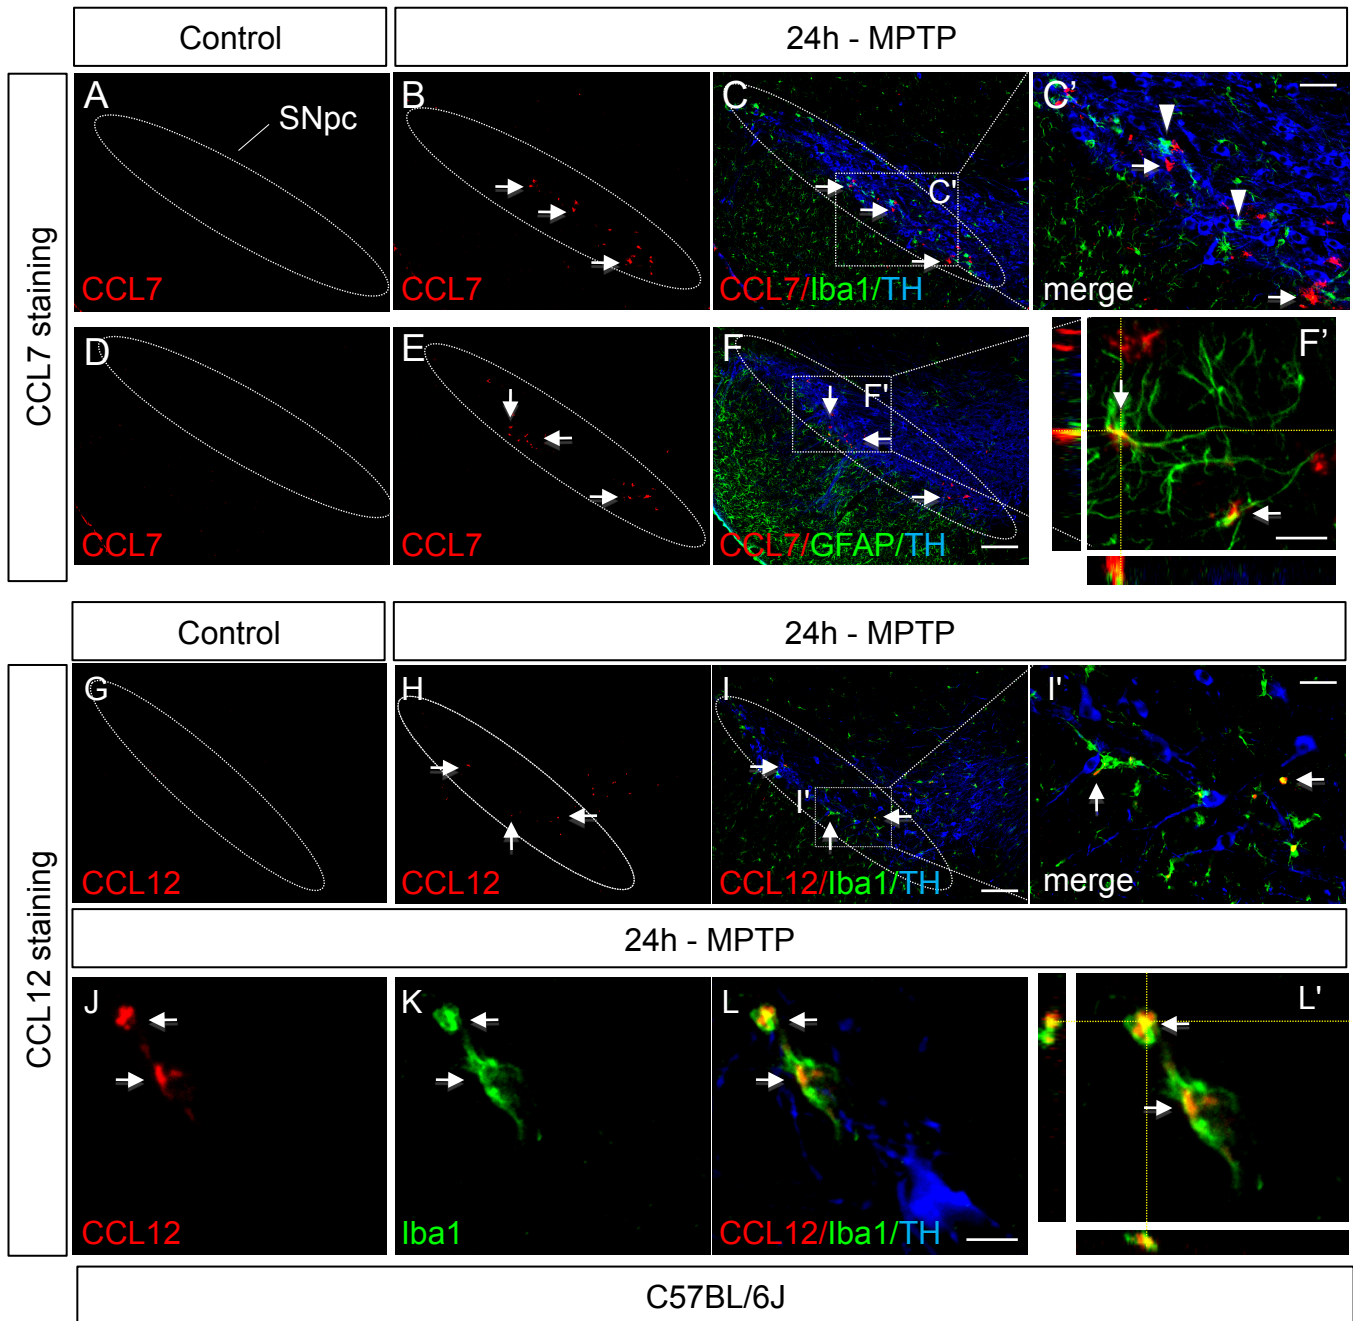

Suppl. Figure 4.
